# Supplementary material
Source: PubMed Central journal article supplement (PMC4494688)
Supplement: NIHMS550805-supplement-1.pdf [file NIHMS550805-supplement-1.pdf]

# **Supplementary Information**

***Ikaros (Ikzf1)* mutation confers integrin-dependent survival  
of pre-B cells and progression to acute lymphoblastic leukemia**

**by**

**Ila Joshi, Toshimi Yoshida, Nilamani Jena, Xiaoqing Qi, Jiangwen Zhang,**

**Richard A. Van Etten, Katia Georgopoulos**

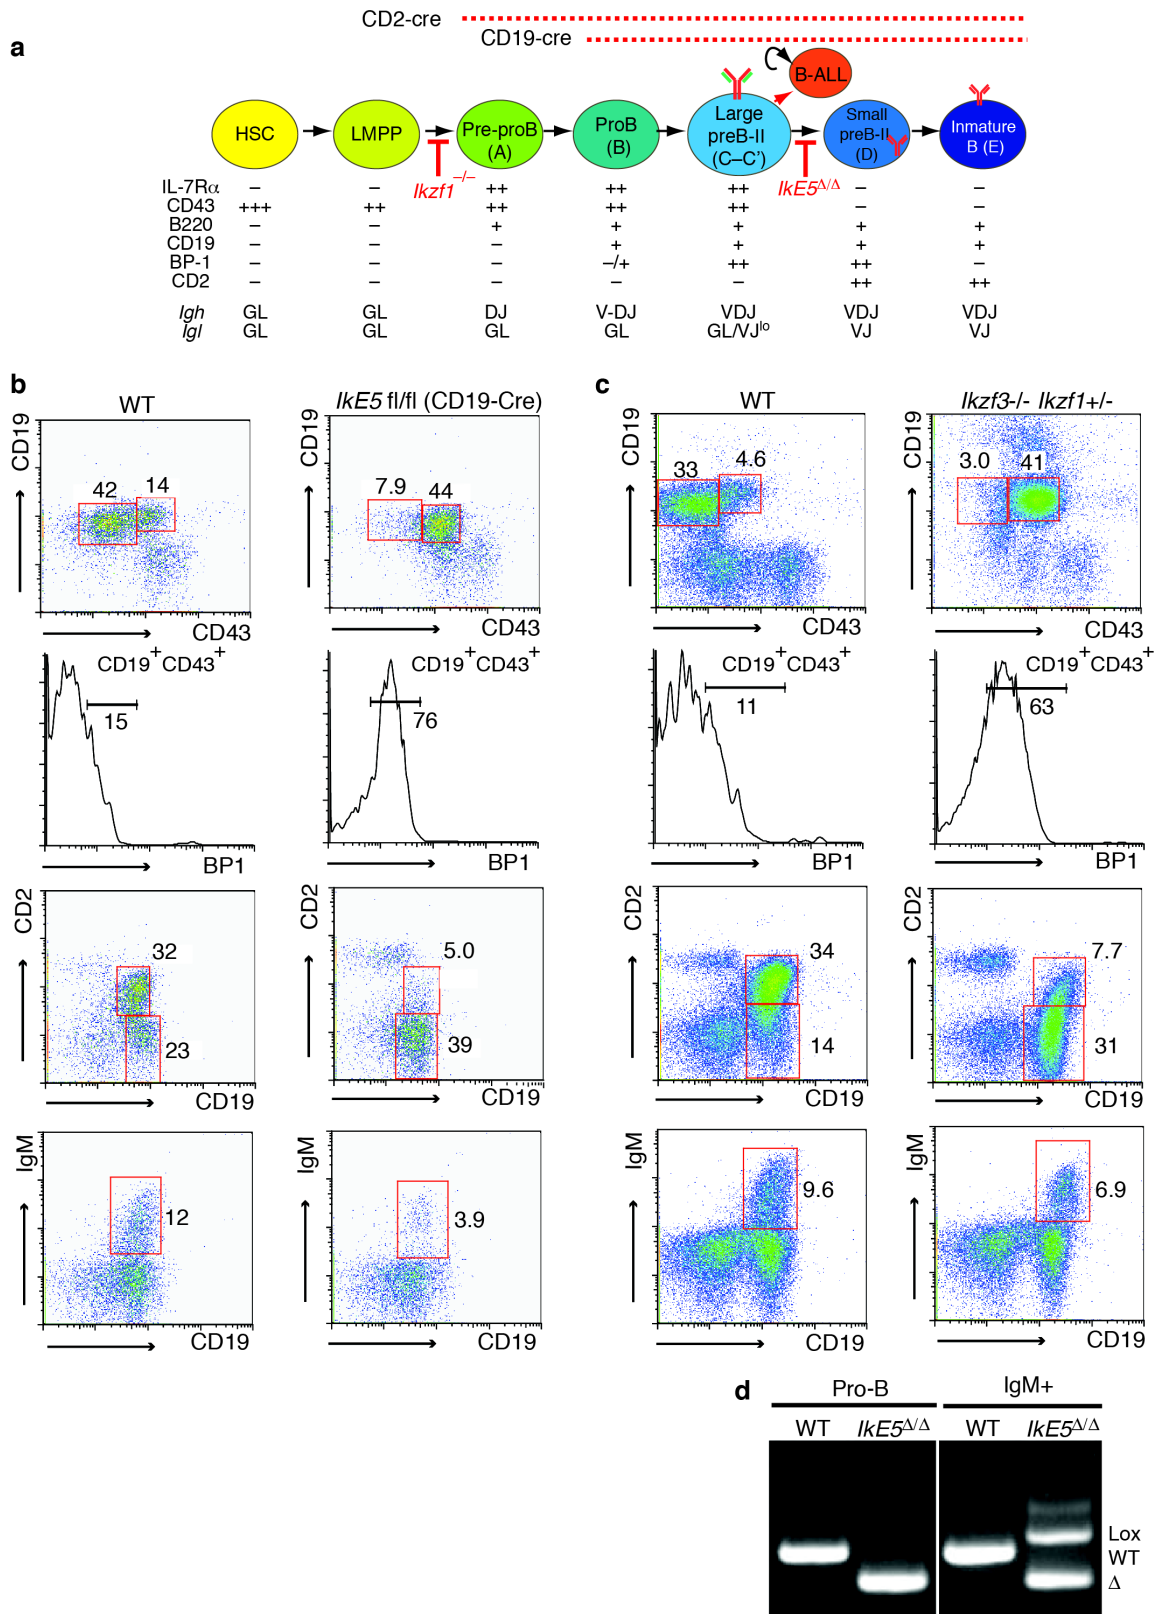

### Supplementary Figure 1. Analysis of B-lymphoid differentiation in *Ikaros* mutant BM.

**a**, Schematic representation of B cell differentiation as defined by stage-specific markers. Dotted lines indicate differentiation stages with *CD2-* or *CD19-Cre* activity, red lines the differentiation block associated with germline or conditional *Ikaros* gene mutations, and red arrow the stage from which B-ALL is derived. **b-c**, Representative flow cytometric analyses of wild-type (WT), *IkE5<sup>fl/fl</sup> CD19-Cre* (**b**) and *Ikzf3<sup>-/-</sup> Ikzf1<sup>+/-</sup>* (**c**) BM cells as described in Fig. 1d, demonstrating a consistent block at the large pre-B cell stage. *IkE5<sup>fl/fl</sup> CD19-Cre*,  $n=9$ ; *Ikzf3<sup>-/-</sup> Ikzf1<sup>+/-</sup>*,  $n=3$ . **d**, Deletion analysis of the *Ikzf1* locus in pro-B cells ( $CD19^+CD43^+c\text{-Kit}^+BP1^-$ ) and immature B cells ( $CD19^+IgM^+$ ) sorted from BM of *IkE5<sup>fl/fl</sup> CD2-Cre* mice.

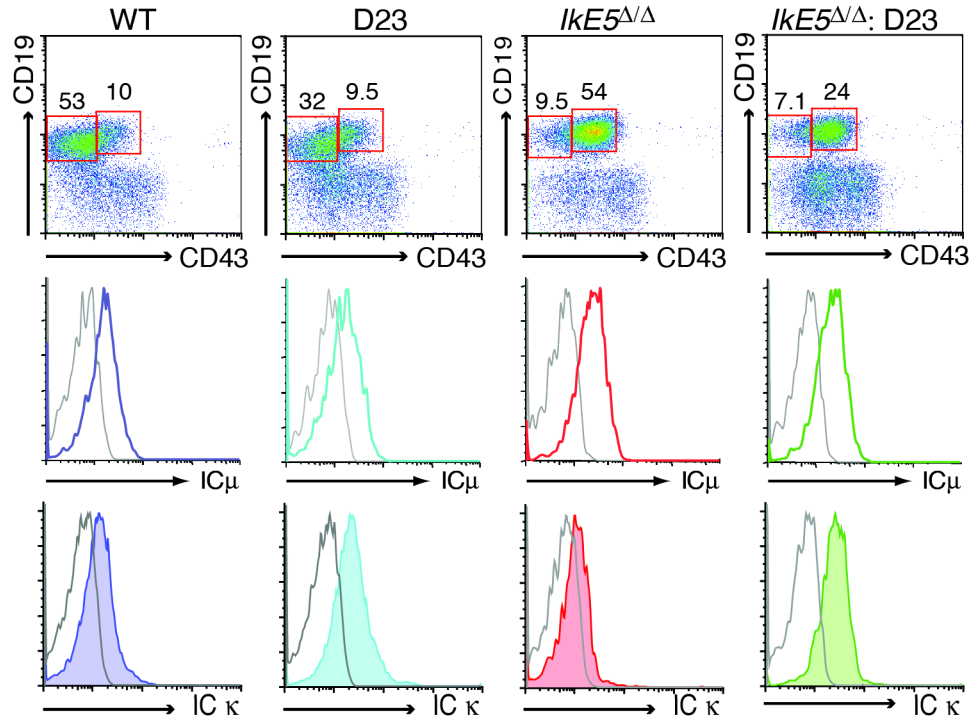

**Supplementary Figure 2. Analysis of B-lymphoid differentiation in Ig $\kappa$ -reconstituted Ikaros mutant pre-B cells.** Flow cytometric analysis of BM B cells from WT, D23, *Ike5<sup>fl/fl</sup> CD2-Cre* and *Ike5<sup>fl/fl</sup> CD2-Cre:D23* and intracellular staining for IgM and Ig $\kappa$  in large pre-B cells (CD19<sup>+</sup>CD43<sup>+</sup>BP1<sup>+</sup>).

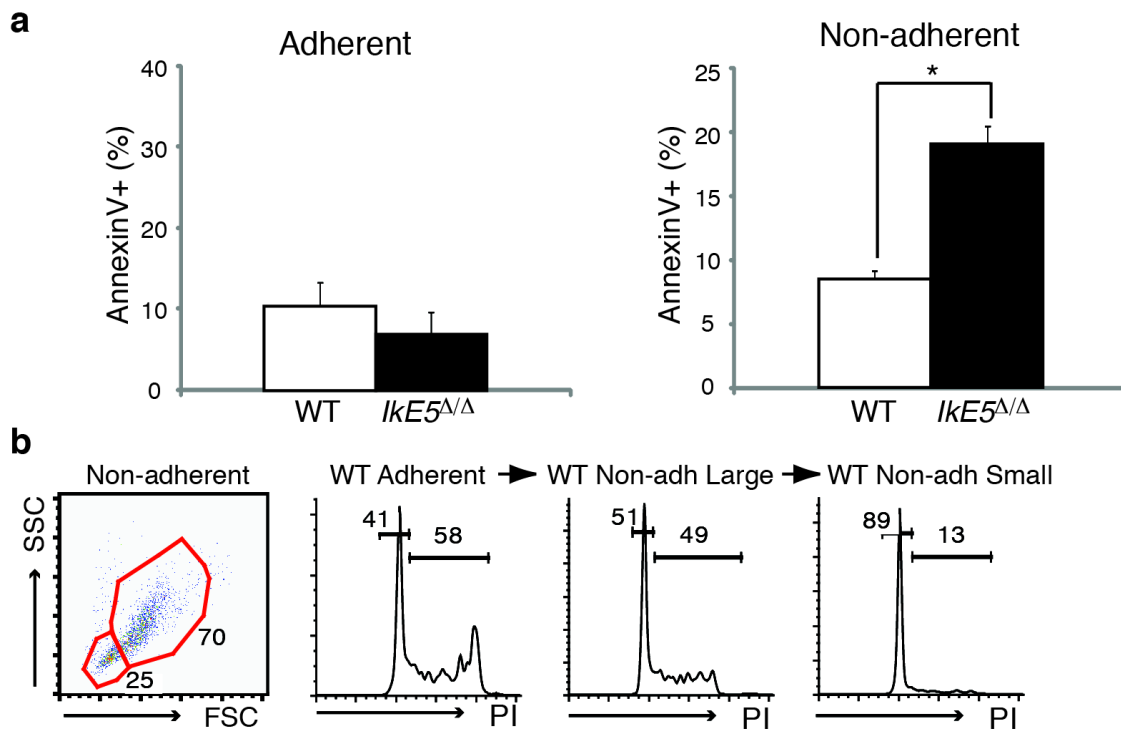

**Supplementary Figure 3. Characterization of adherent and non-adherent WT pre-B cells.**

**a**, The mean pro-apoptotic index (percentage of Annexin V<sup>+</sup> cells) of WT and *Ike5*<sup>Δ/Δ</sup> adherent (left panel) and non-adherent (right panel) pre-B cells propagated on OP9 stroma with 5 ng/ml of supplemental IL-7. Asterisk denotes significant changes in apoptosis between WT and mutant pre-B cells ( $n=2$ ,  $*P < 0.05$ ). **b**, Representative cell cycle profiles of WT adherent and WT non-adherent pre-B cells grown as in **Fig. 2a**. WT non-adherent pre-B cells were further subdivided according to FSC. The ratio of small vs. large non-adherent WT pre-B in IL-7 cultures increases over time (data not shown). The progressive loss in proliferation in the WT non-adherent pre-B cell phase seen even in the presence of IL-7, suggests a need for stromal contact for maintenance of pre-B cell proliferation. Withdrawal of IL-7 accelerates this process with the ratio of small-non-cycling/large-cycling non-adherent pre-B cells increasing dramatically within 24 hrs (data not shown).

**a**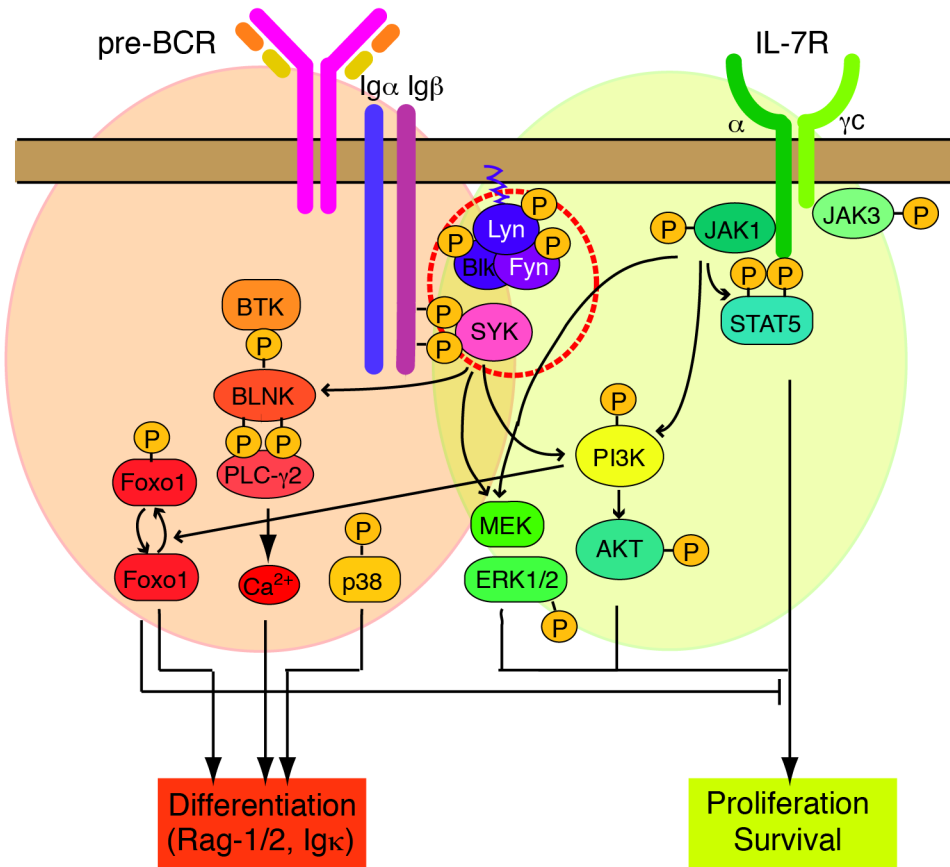**b**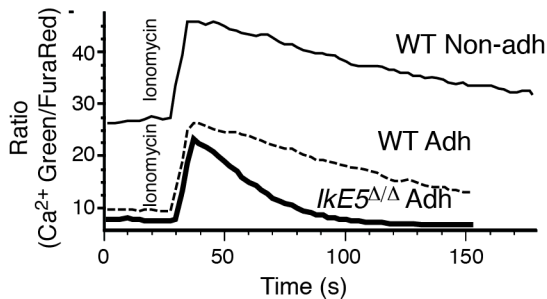**c**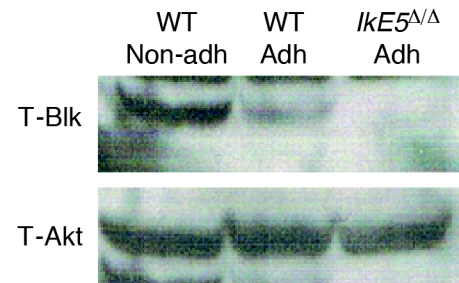

### Supplementary Figure 4. Signaling pathways in WT and IKAROS-deficient pre-B cells.

**a.** Schematic representation of signaling pathways operating downstream of pre-BCR and IL-7R and supporting pre-B cell proliferation, survival and differentiation. Signaling effectors assayed for expression and activity in **Fig. 4a, b** are shown. **b.** Ca<sup>2+</sup> flux (Ca<sup>2+</sup> Green/ Fura Red) after ionomycin treatment of WT and *IKE5*<sup>Δ/Δ</sup> adherent and WT non-adherent pre-B cells, n=2. **c.** Total Blk expression is shown for WT and *IKE5*<sup>Δ/Δ</sup> adherent and non-adherent pre-B cells, with total Akt (T-Akt) as loading control.

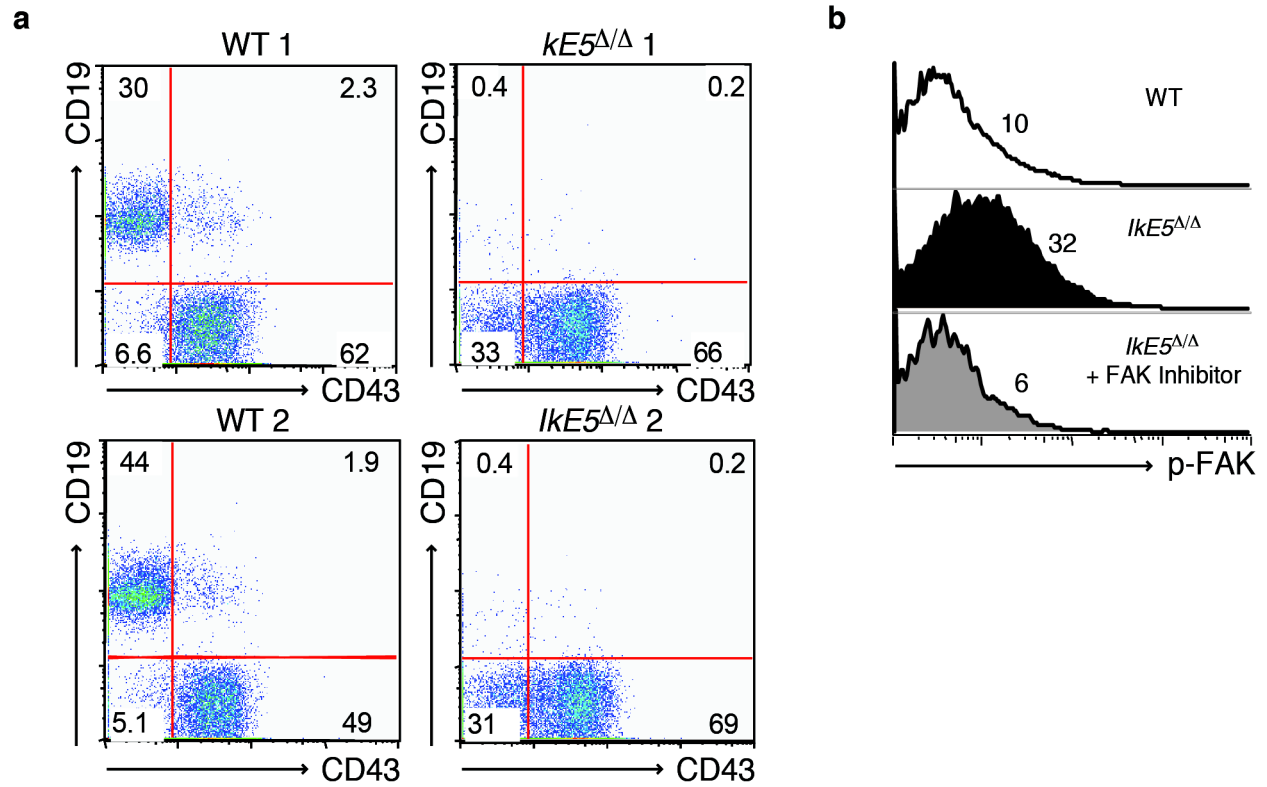

**Supplementary Figure 5. Lack of circulating *IκE5<sup>Δ/Δ</sup>* pre-B cells and reduction of p-FAK by FAK inhibitor.**  
**a**, Flow cytometric analysis of peripheral blood from wild-type (WT) and *IκE5<sup>fl/fl</sup> CD19-Cre* mice for large pre-B ( $CD19^+CD43^+$ ) and small pre-B cells ( $CD19^+CD43^-$ );  $n=2$  for each genotype. **b**, FAK inhibitor treatment reduces p-FAK staining in BM *IκE5<sup>Δ/Δ</sup>* pre-B cells, as described in **Fig. 6b**.

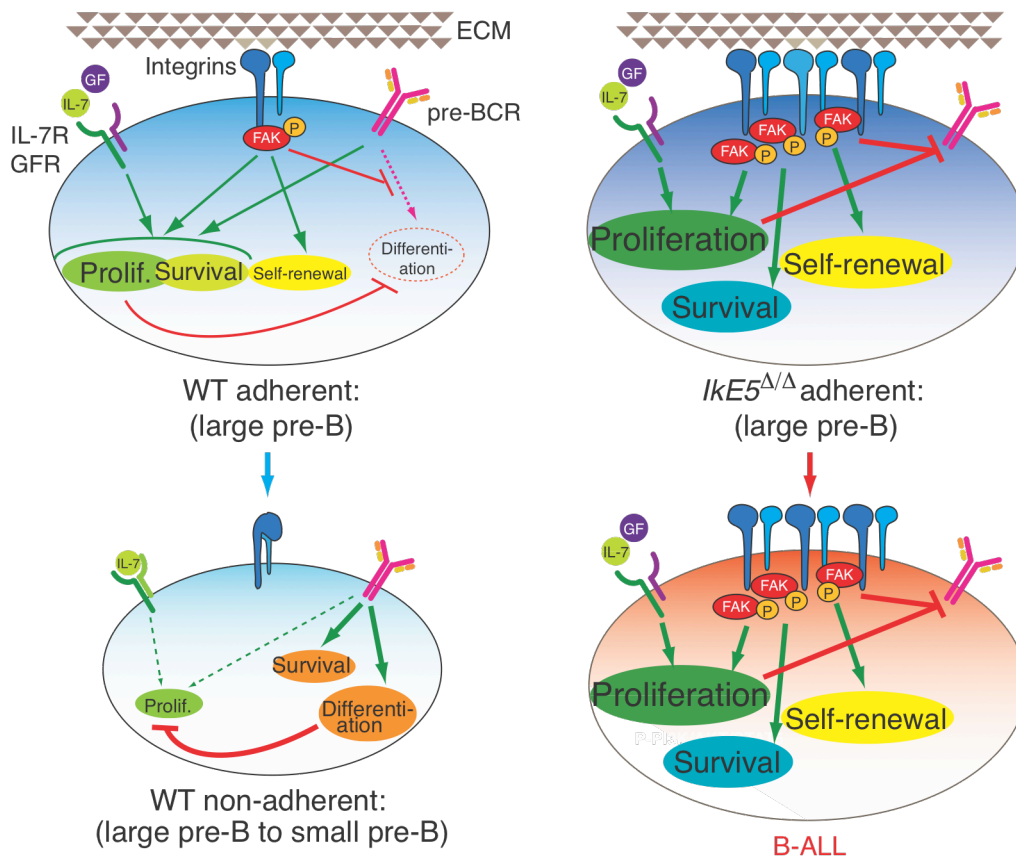

**Supplementary Figure 6. Model of pre-BCR, growth factor, and integrin signaling interactions operating during pre-B cell differentiation.** Augmentation of integrin signaling by *IκE5*<sup>Δ/Δ</sup> mutation blocks cells in a stromal-dependent, self-renewing and highly proliferative state where they are unable to differentiate, from which B-ALL arises.

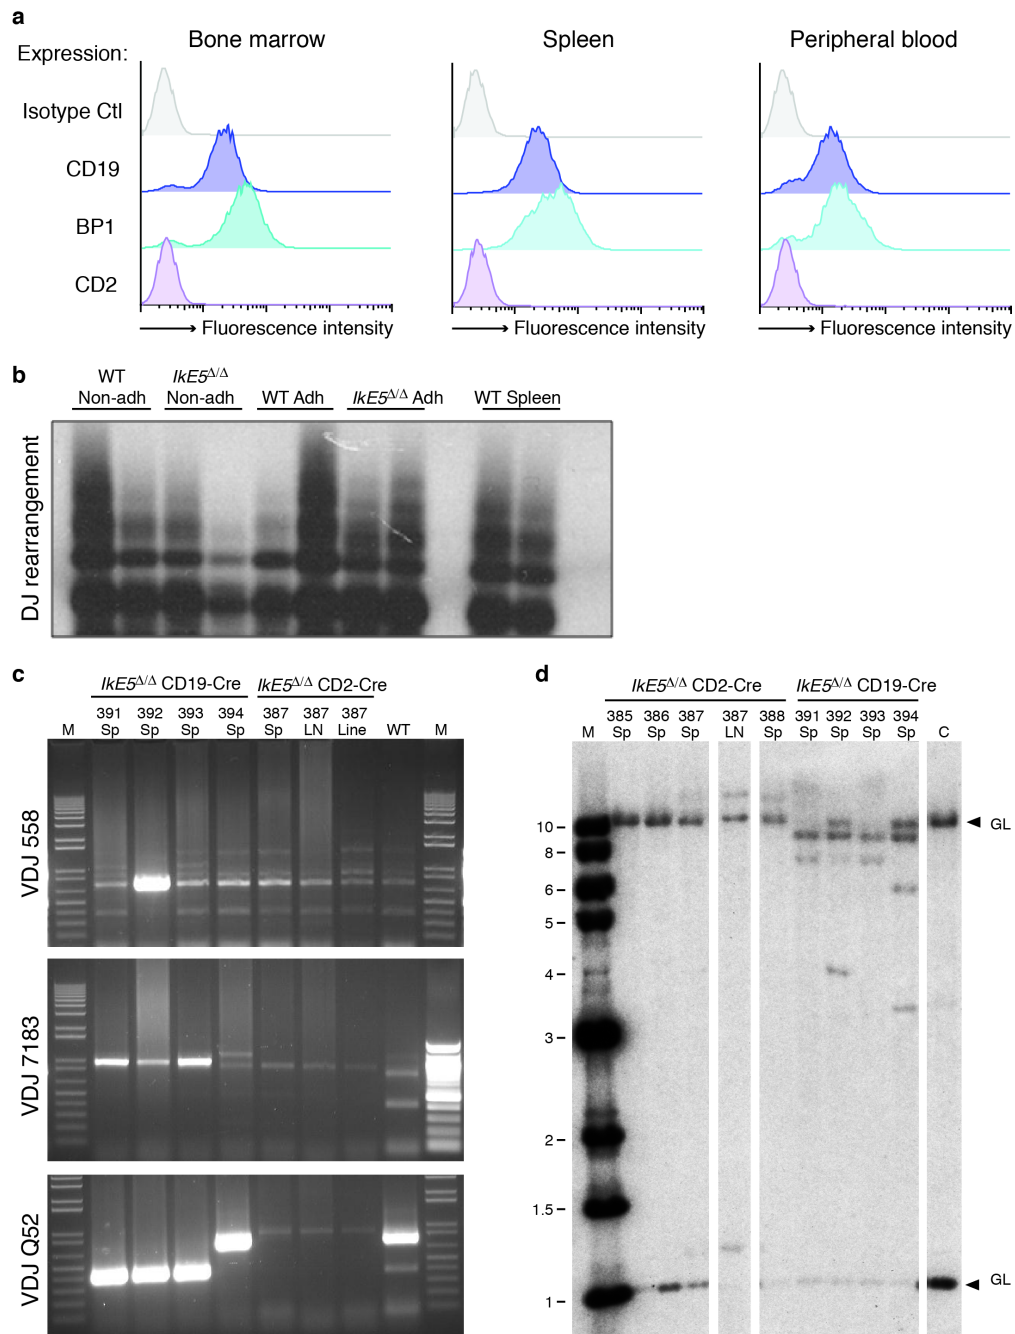

**Supplementary Figure 7. Clinicopathological characterization of lymphoid tumors from recipients of *IκE5*<sup>ΔΔ</sup> pre-B cells.** **a**, Immunophenotypic analysis of precursor B-cell acute lymphoblastic leukemia/lymphoma derived from *IκE5*<sup>ΔΔ</sup> pre-B cells demonstrates a similar large pre-B cell surface phenotype (CD19<sup>+</sup>CD43<sup>+</sup>BP1<sup>+</sup>CD2<sup>-</sup>) to the original transplanted population. **b**, Analysis of parental WT and *IκE5*<sup>ΔΔ</sup> pre-B cell populations (non-adherent and adherent), showing polyclonal *Igh* rearrangements similar to that observed in WT splenocytes. The PCR-based *D-J* rearrangement assay described in **Fig. 1f** was used to determine clonality. PCR products were probed with a *JH*-specific probe. **c**, PCR analysis of *V-D-J* rearrangements in lymphoid tumors from NSG recipients of *IκE5*<sup>ΔΔ</sup> pre-B cells, as described in **Fig. 1f**. Forward primers from specific *VH* regions (558, Q52, 7183) were used in conjunction with a common reverse primer from *JH3* (**Fig. 1f**). Note that lymphoid tumors from mice #391, 393, and 394 (from *IκE5*<sup>ΔΔ</sup> *CD19-Cre* donor) had monoclonal *Igh* rearrangement while #392 tumor had clonal rearrangement of both *Igh* alleles. **d**, Southern blot analysis of *Igh* gene rearrangements in tissues of leukemic NSG recipients of *IκE5*<sup>ΔΔ</sup> pre-B cells, as in panel **c**. The position of two germline (GL) *Igh* bands (present in control BM myeloid cells, "C") is denoted by arrowheads. The tissue origin of the sample is indicated (Sp, spleen; LN, lymph node). Common rearrangements between tumors from *IκE5*<sup>ΔΔ</sup> *CD19-Cre* recipients are indicated by asterisks. Rearrangements in *IκE5*<sup>ΔΔ</sup> *CD2-Cre* recipients #385 and 386 may not be detected by this probe.
